# Supplementary material
Source: PubMed Central journal article supplement (PMC9671864)
Supplement: NIHMS1841834-supplement-3.pdf [file NIHMS1841834-supplement-3.pdf]

**A**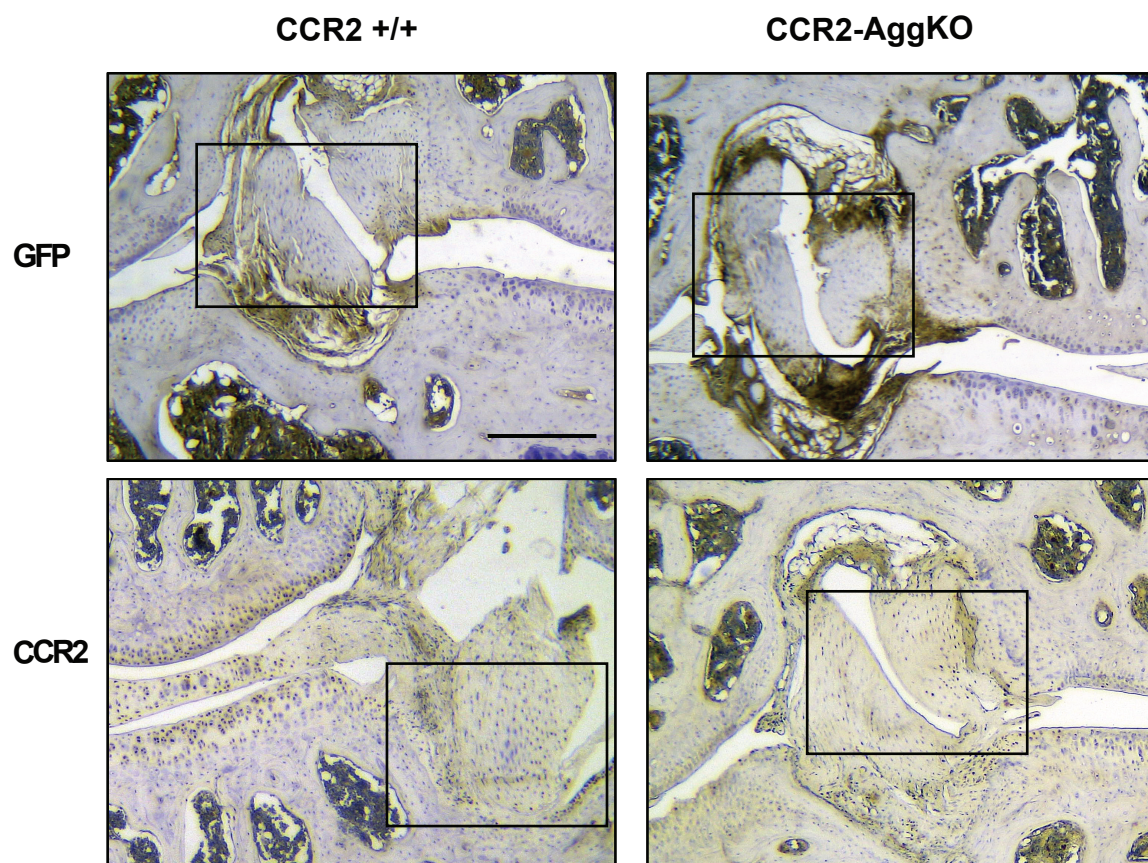**B**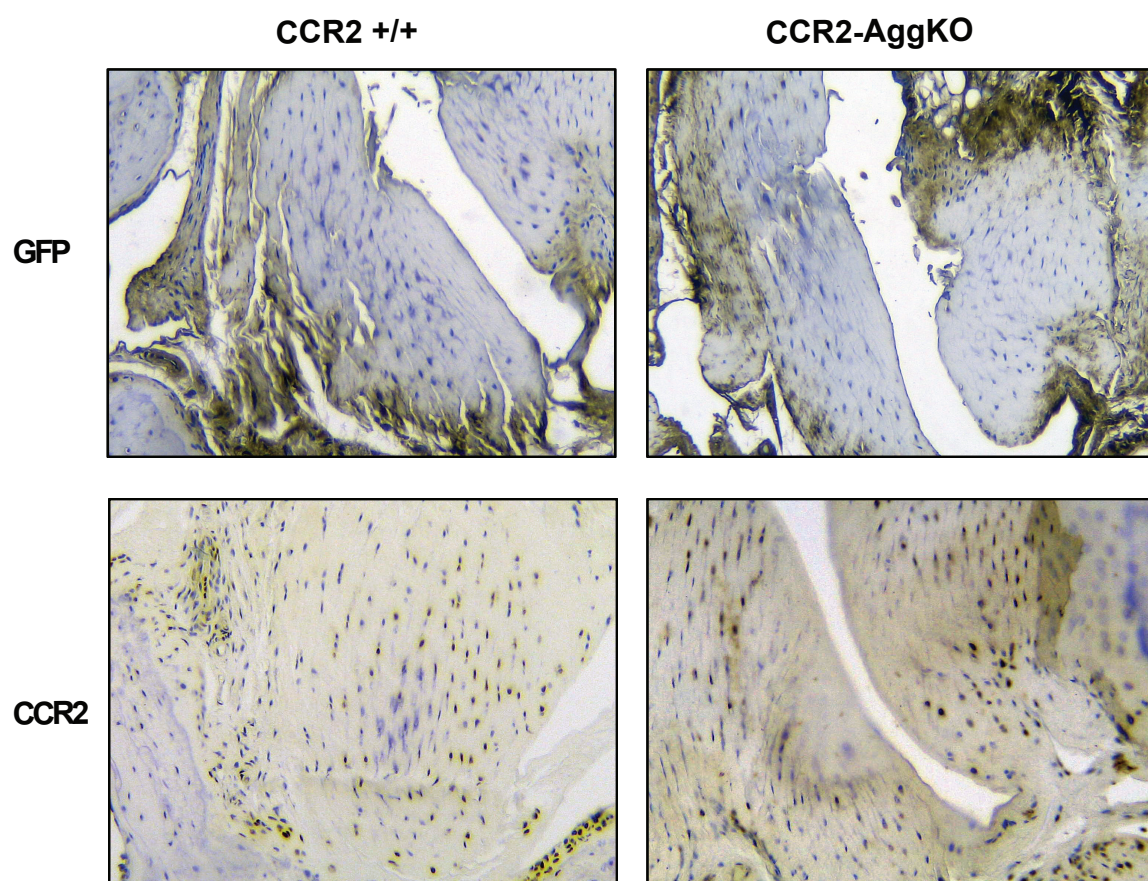

**A**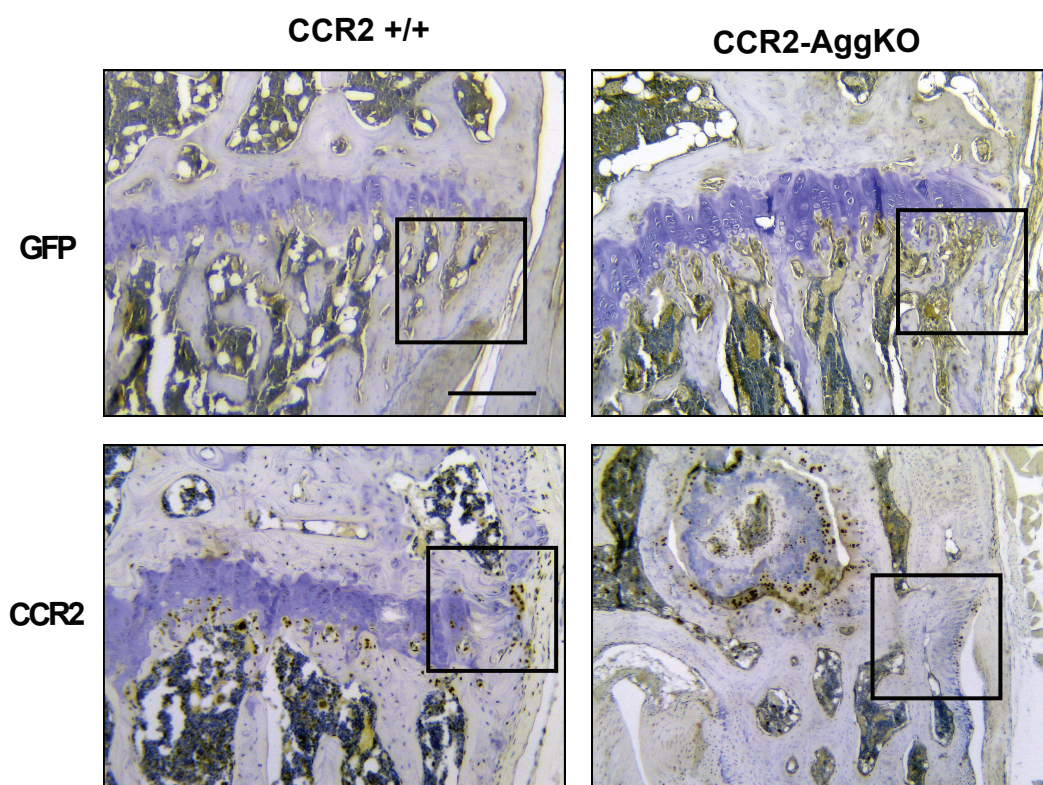**B**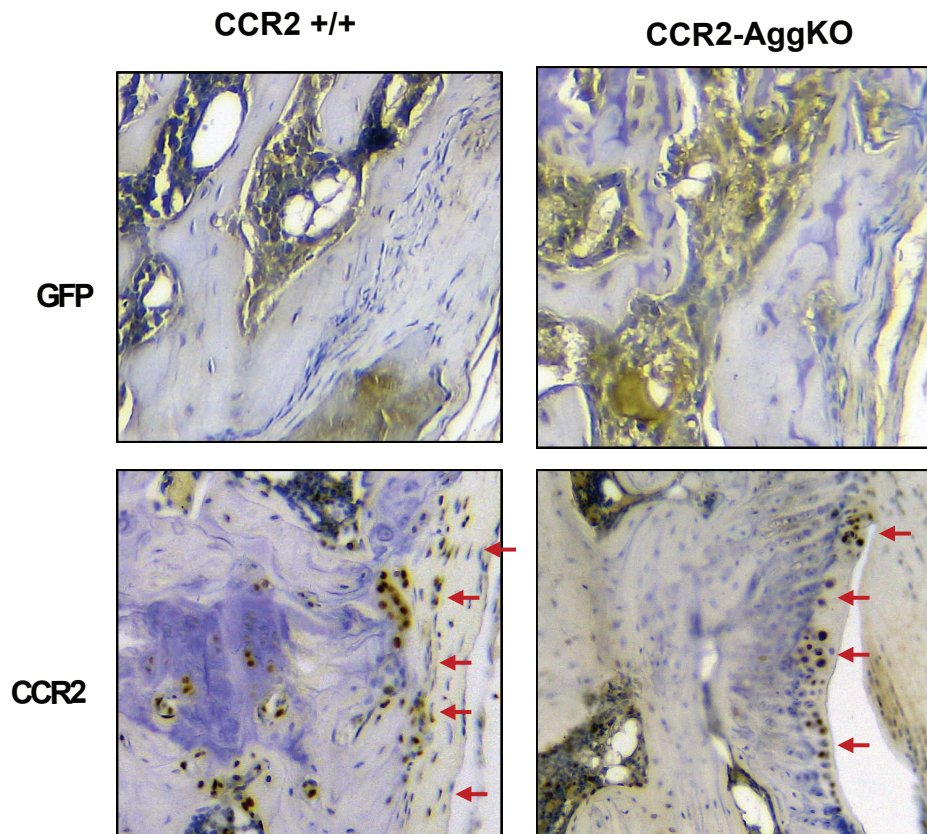

**A**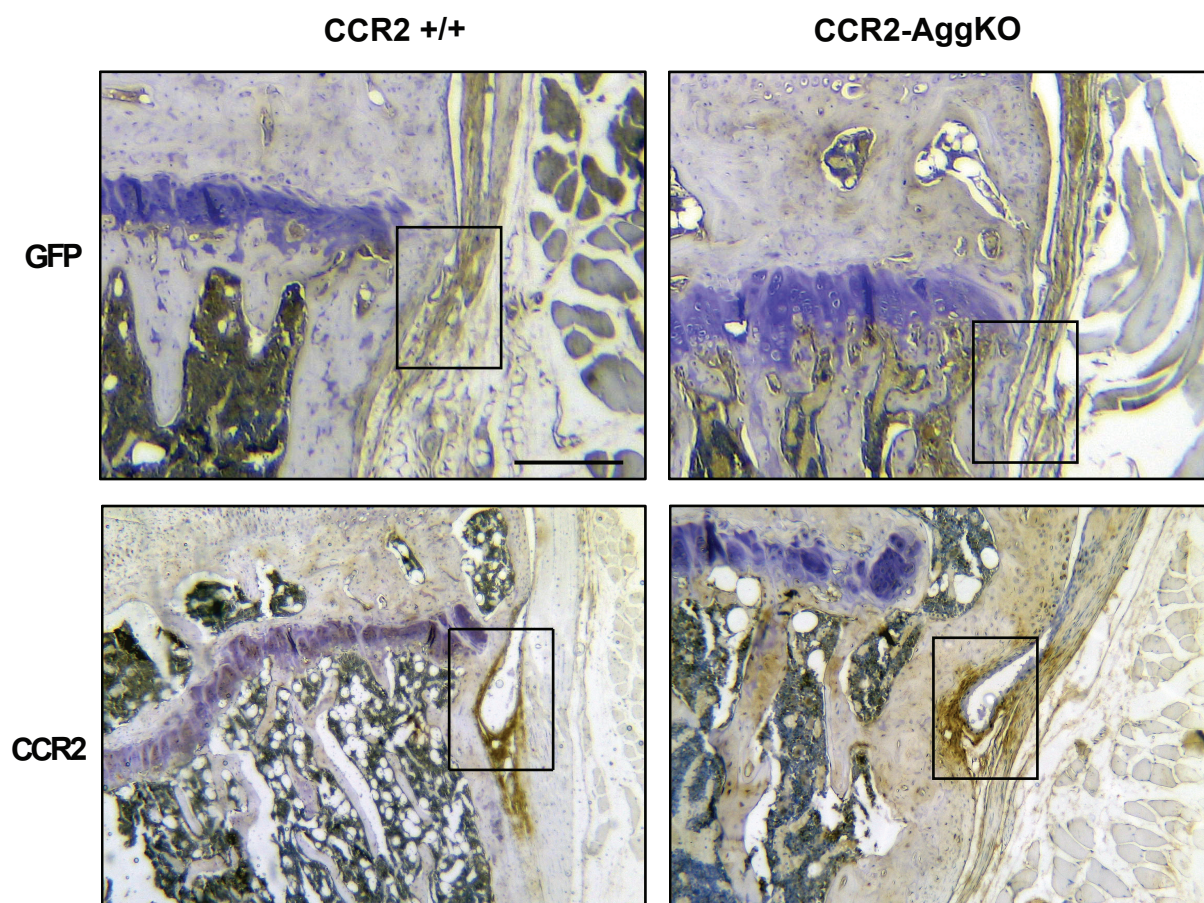**B**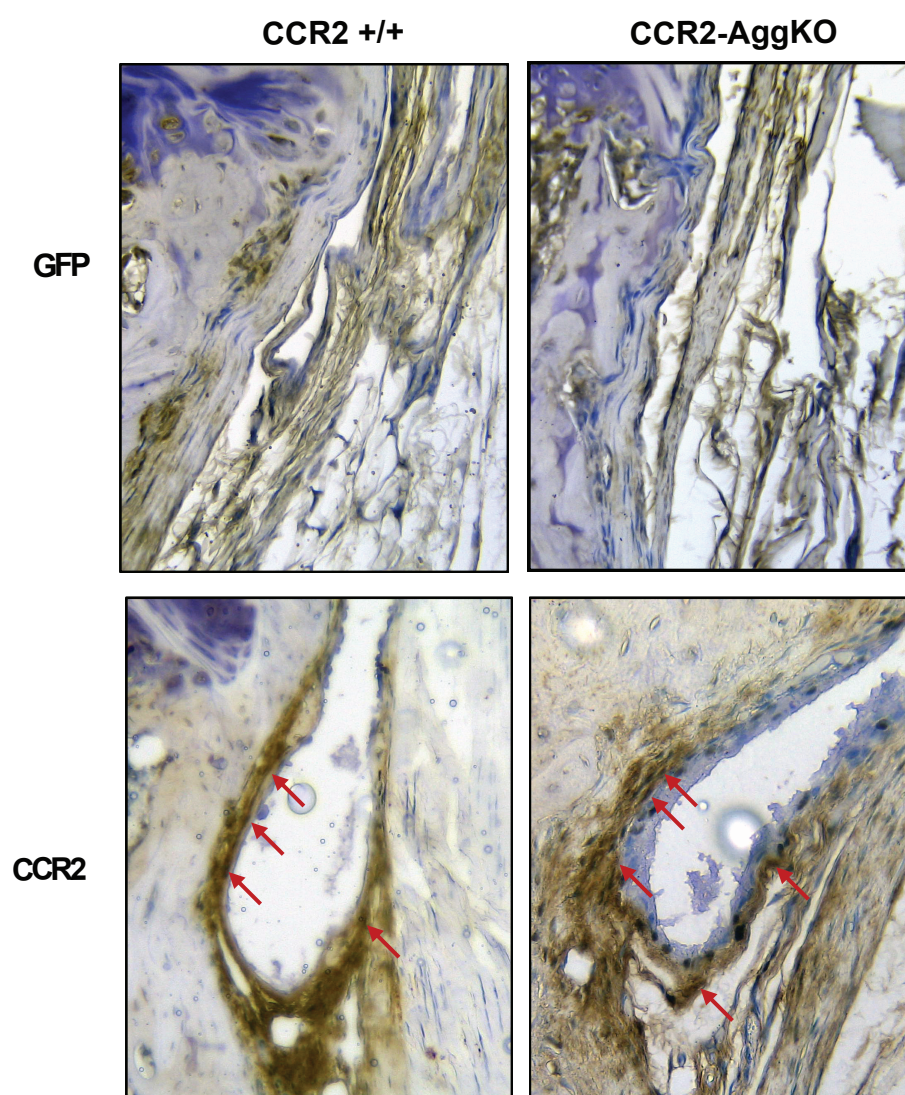

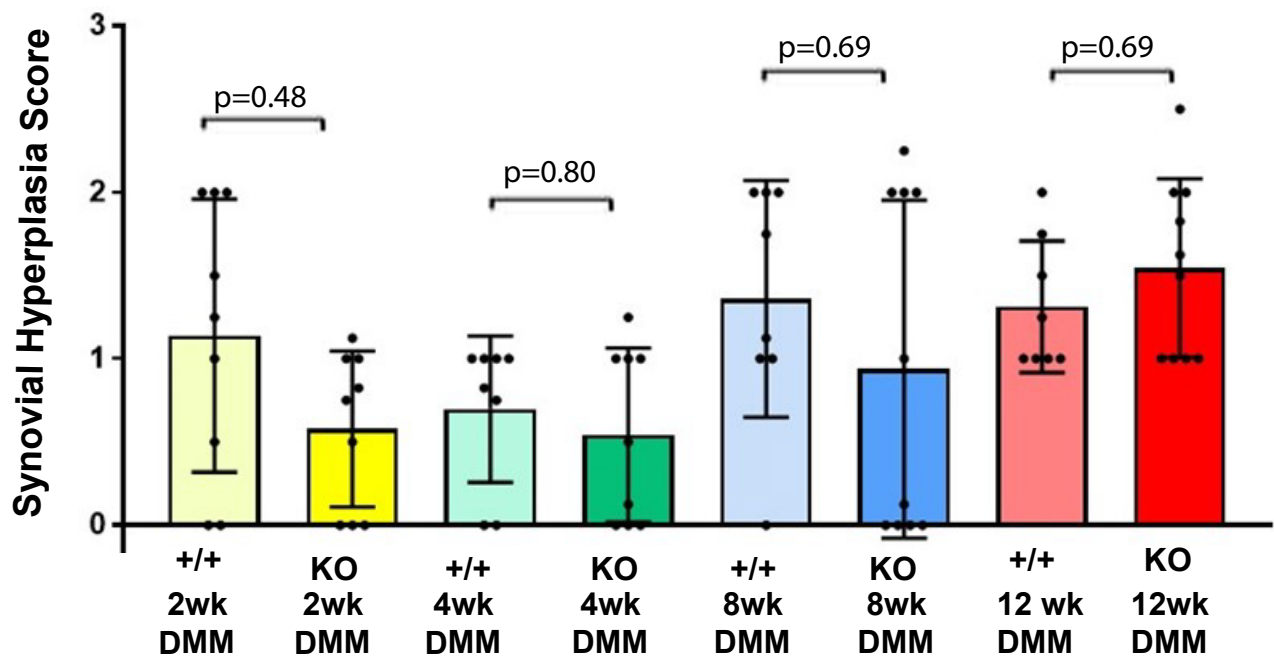

Supplemental Figure S4

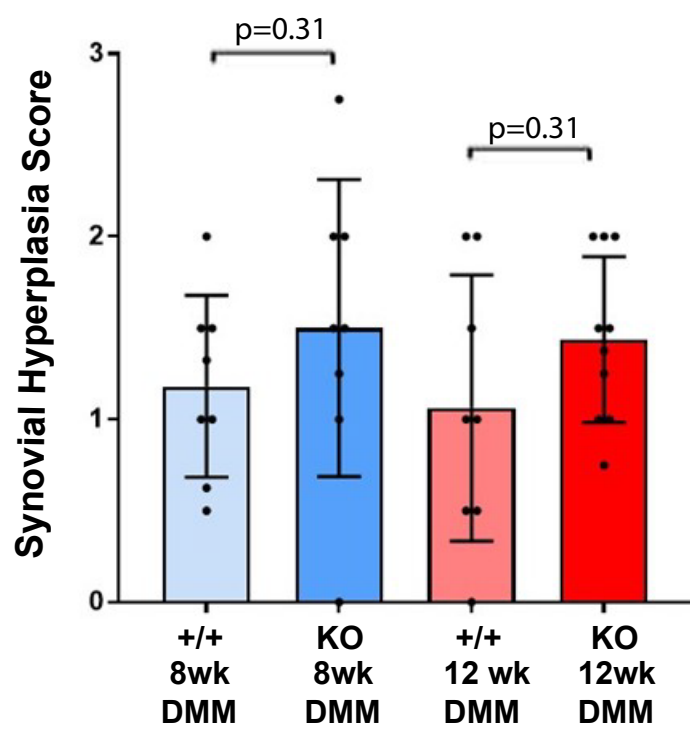

Supplemental Figure S5

### Non-OA Contralateral or SHAM

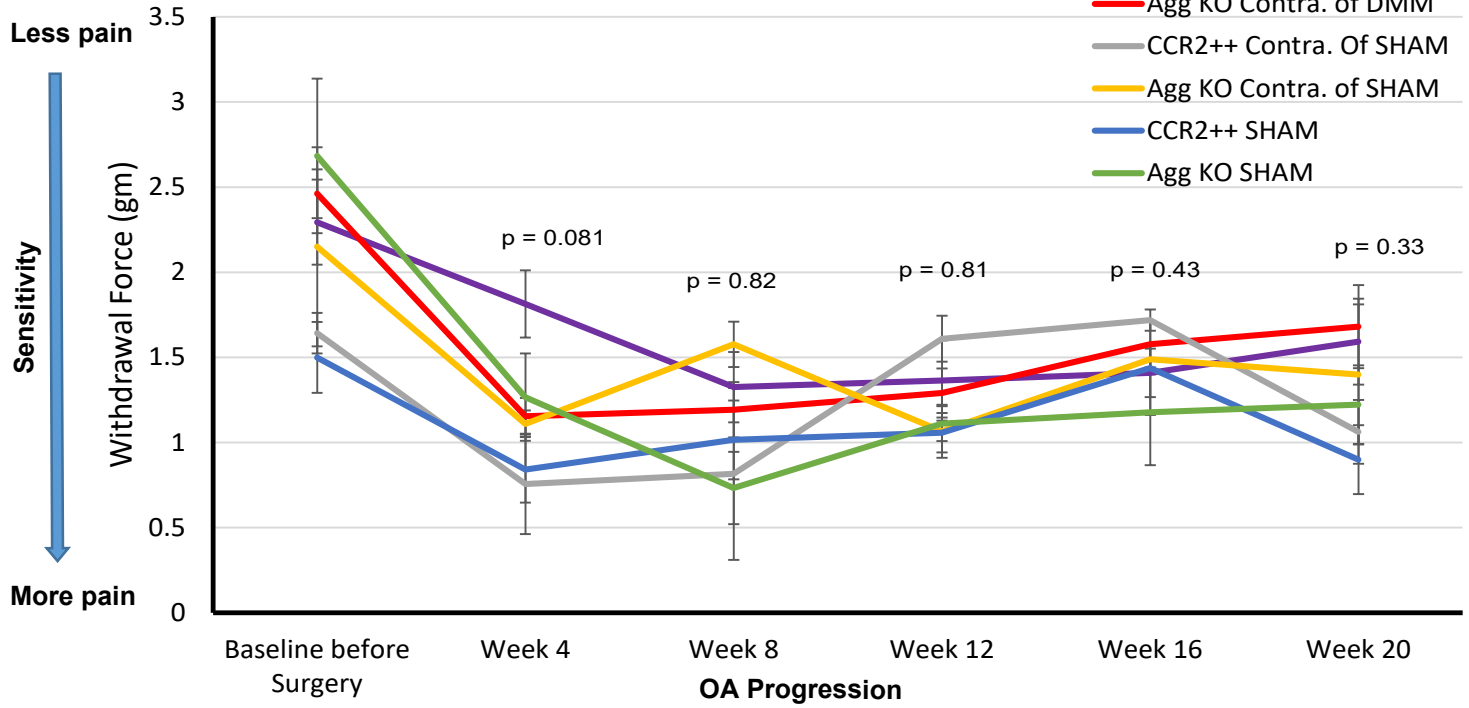

Supplemental Figure S6

**A**

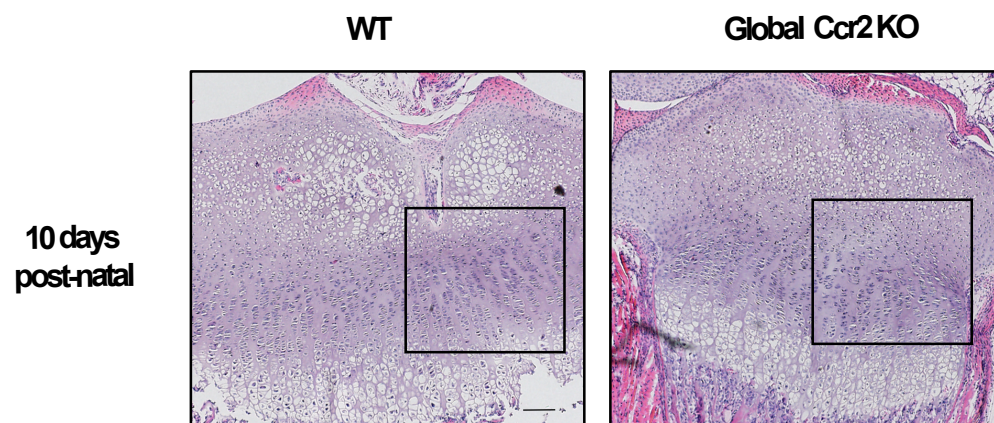

**B**

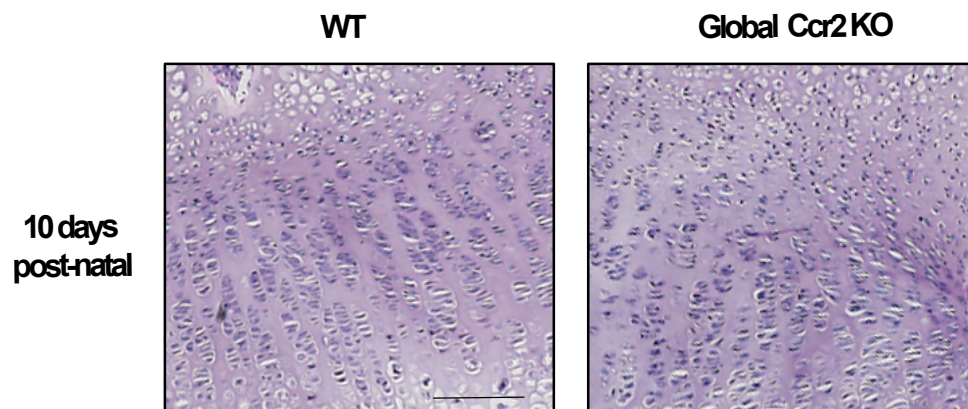

**Supplemental Figure S7**
